# Supplementary material for: Palliative Care Consultation Reduces Heart Failure Transitions: A Matched Analysis
Source: PubMed Central journal article supplement — J Am Heart Assoc. 2020 May 27;9(11):e013989. doi: 10.1161/JAHA.119.013989 (PMC7428983; doi:10.1161/jaha.119.013989), 2020-05-27
Supplement: JAH3-9-e013989-s001.pdf [file JAH3-9-e013989-s001.pdf]

# **Supplemental Material**

**Table S1. Missing Data from Variables Included in the Propensity Matching.**

| Missingness Table                                      | Palliative Cohort |               | Matched Cohort |               |
|--------------------------------------------------------|-------------------|---------------|----------------|---------------|
|                                                        | N=1431            |               | N=1431         |               |
|                                                        | Nonmissing N      | Missing % (N) | Nonmissing N   | Missing % (N) |
| Demographics                                           |                   |               |                |               |
| <b>Age</b>                                             | 1431              | 0% (0)        | 1431           | 0% (0)        |
| <b>Sex</b>                                             | 1431              | 0% (0)        | 1431           | 0% (0)        |
| <b>Race</b>                                            | 1431              | 0.7% (10)     | 1419           | 0.8% (12)     |
| <b>Elixhauser Comorbidity</b>                          | 1431              | 0% (0)        | 1431           | 0% (0)        |
| Laboratory Data                                        |                   |               |                |               |
| <b>Urea Nitrogen (BUN)</b>                             | 1286              | 10.1% (145)   | 1330           | 7.1% (101)    |
| <b>Creatinine</b>                                      | 1306              | 8.7% (125)    | 1303           | 8.9% (128)    |
| <b>Sodium</b>                                          | 1377              | 3.8% (54)     | 1382           | 3.4% (49)     |
| <b>Brain Naturetic Peptide (BNP)</b>                   | 892               | 37.7(539)     | 931            | 34.9(500)     |
| <b>Potassium</b>                                       | 1343              | 6.2% (88)     | 1373           | 4.1% (58)     |
| <b>Hematocrit</b>                                      | 1341              | 6.3% (90)     | 1375           | 3.9% (56)     |
| Clinical Data                                          |                   |               |                |               |
| <b>Ejection Fraction</b>                               | 1428              | 0.2% (3)      | 1425           | 0.4% (6)      |
| <b>Blood Pressure (Mean Arterial)</b>                  | 1400              | 2.2% (31)     | 1419           | 0.8% (12)     |
| <b>Pulse</b>                                           | 1400              | 2.2% (31)     | 1420           | 0.8% (11)     |
| <b>Body Mass Index</b>                                 | 1176              | 17.8% (255)   | 1231           | 14.0% (200)   |
| Utilization Data                                       |                   |               |                |               |
| <b>Mean LOS in prior 12 months of hospitalizations</b> | 1431              | 0% (0)        | 1431           | 0% (0)        |
| <b>Days Alive after Index Admission</b>                | 1431              | 0% (0)        | 1431           | 0% (0)        |
| Baseline Cost                                          |                   |               |                |               |
| <b>Total cost in prior 12 months</b>                   | 1431              | 0% (0)        | 1431           | 0% (0)        |

**Table S2. Burdensome Transition Outcome in the HF Population.**

|                        | Palliative Cohort N=1431 |      | Matched Cohort N=1431 |      | p-value |
|------------------------|--------------------------|------|-----------------------|------|---------|
|                        | N                        | %    | N                     | %    |         |
| Burdensome Transition* | 516                      | 36.1 | 655                   | 45.8 | <.0001  |

\*The Burdensome Transition composite outcome includes 2+ readmissions, ICU admission, feeding tube or mechanical ventilation in the 6 months after index hospitalization; Proportional hazard modeling identified a significant reduction in the hazard of burdensome transition among those with palliative care consultation (HR = 0.78, 95%CI 0.69,0.88). After adjustment for facility fixed effects, the hazard of burdensome transition was significantly reduced in those with palliative care consultation (adjusted HR =0.75, 95%CI 0.65, 0.86)

**Figure S1. Variability among VA Medical Centers in Palliative Consultation among HF Patients.**

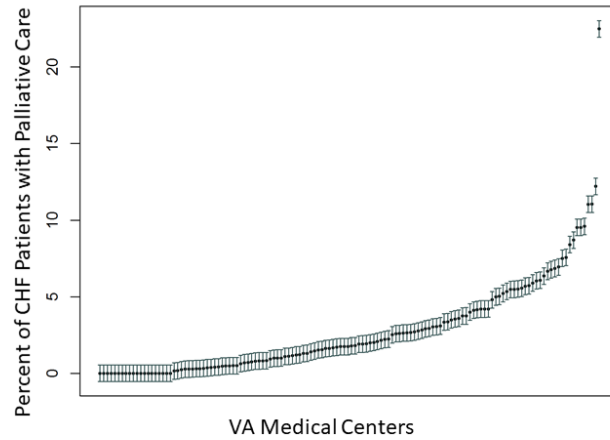

Each VA Medical Center (n=129) is represented as a point on the horizontal axis, there is a variability in the availability and utilization of palliative care among CHF patients.

**Figure S2. Kaplan Meier Curve for Burdensome Transitions\*.**

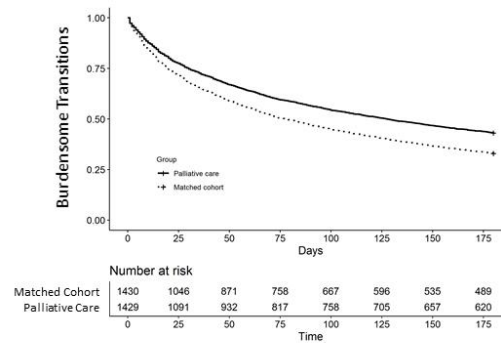

The Burdensome Transition composite outcome includes 2+ readmissions, ICU admission, feeding tube or mechanical ventilation in the 6 months after index hospitalization; Proportional hazard modeling identified a significant reduction in the hazard of burdensome transition among those with palliative care consultation (HR = 0.78, 95%CI 0.69,0.88). After adjustment for facility fixed effects, the hazard of burdensome transition was significantly reduced in those with palliative care consultation (adjusted HR =0.75, 95%CI 0.65, 0.86)
